# Supplementary material for: MicroRNA function can be reversed by altering target gene expression levels
Source: PubMed Central journal article supplement — iScience. 2021 Oct 2;24(10):103208. doi: 10.1016/j.isci.2021.103208 (PMC8560630; doi:10.1016/j.isci.2021.103208), 2021-10-02
Supplement: mmc1.pdf [file mmc1.pdf]

iScience, Volume 24

## **Supplemental information**

### **MicroRNA function can be reversed by altering target gene expression levels**

**Alexander A. Svoronos, Stuart G. Campbell, and Donald M. Engelman**

**Table S1: Literature Analysis of Random MicroRNAs, Related to Main Text and STAR Methods**

| MicroRNA | Apoptosis |          | Cell Proliferation |          | Invastion/Metastasis |          | # of References |
|----------|-----------|----------|--------------------|----------|----------------------|----------|-----------------|
|          | Increase  | Decrease | Increase           | Decrease | Increase             | Decrease |                 |
| miR-25   |           | x        | x                  |          | x                    | x        | 458             |
| miR-451  | x         | x        | x                  | x        | x                    | x        | 462             |
| miR-185  | x         | x        |                    | x        |                      | x        | 313             |
| miR-195  | x         |          |                    | x        |                      | x        | 628             |
| miR-202  | x         | x        | x                  | x        | x                    | x        | 159             |
| miR-30a  | x         | x        | x                  | x        | x                    | x        | 283             |
| miR-411  | x         | x        | x                  | x        |                      | x        | 69              |
| miR-8    | x         |          |                    | x        |                      | x        | 73              |
| miR-22   | x         | x        | x                  | x        |                      | x        | 668             |
| miR-324  | x         | x        | x                  | x        | x                    | x        | 149             |
| miR-148a | x         | x        | x                  | x        | x                    | x        | 105             |
| miR-372  | x         | x        | x                  | x        | x                    | x        | 135             |
| miR-92   | x         | x        | x                  | x        | x                    | x        | 169             |
| miR-184  | x         | x        | x                  | x        | x                    | x        | 236             |
| miR-218  | x         |          |                    | x        |                      | x        | 466             |
| miR-223  | x         | x        | x                  | x        | x                    | x        | 1195            |
| miR-153  | x         | x        | x                  | x        | x                    | x        | 202             |
| miR-409  | x         |          | x                  | x        | x                    | x        | 111             |
| miR-322  | x         | x        | x                  | x        |                      |          | 65              |
| miR-139  | x         | x        | x                  | x        | x                    | x        | 365             |

# of microRNAs that exhibit both a promoting effect and a suppressive effect in one or more categories (apoptosis, cell proliferation, and/or invasion/metastasis): 17 (85%)

# of microRNAs that exhibit both a promoting effect and a suppressive effect in all three categories: 11 (55%)

**Table S2: List of Model Equations, Related to STAR Methods**

| <b>Protein/Protein Complex</b> | <b>Equation Governing Concentration Over Time<br/>(i.e., Equation for Rate of Change in Concentration)</b>                                                                                                                                                                                                                                                                                                                                                                              |
|--------------------------------|-----------------------------------------------------------------------------------------------------------------------------------------------------------------------------------------------------------------------------------------------------------------------------------------------------------------------------------------------------------------------------------------------------------------------------------------------------------------------------------------|
| Unbound,<br>Inactivated BAK1   | $\frac{d[inbak1]}{dt} = k_{bak1} * (1 - f) - d_{bak1} * [inbak1] - k_{act} * (AddAct + [puma]) * [inbak1] + k_{deact} * [bak1]$                                                                                                                                                                                                                                                                                                                                                         |
| Unbound,<br>Activated BAK1     | $\frac{d[bak1]}{dt} = k_{act} * (AddAct + [puma]) * [inbak1] - k_{deact} * [bak1] - b_{bak1}^{mcl1} * [bak1] * [mcl1] + u_{bak1}^{mcl1} * [bak1.mcl1] - b_{bak1}^{bcl2} * [bak1] * [bcl2] + u_{bak1}^{bcl2} * [bak1.bcl2] - b_{bak1}^{bclw} * [bak1] * [bclw] + u_{bak1}^{bclw} * [bak1.bclw] - 2 * b_{bakdimer} * [bak1]^2 + 2 * u_{bakdimer} * [bakdimer] - d_{bak1} * [bak1] + 2 * d_{bak1} * [bakdimer] + d_{mcl1} * [bak1.mcl1] + d_{bcl2} * [bak1.bcl2] + d_{bclw} * [bak1.bclw]$ |
| BAK1<br>Homodimer              | $\frac{d[bakdimer]}{dt} = b_{bakdimer} * [bak1]^2 - u_{bakdimer} * [bakdimer] - 2 * d_{bak1} * [bakdimer]$                                                                                                                                                                                                                                                                                                                                                                              |
| MCL1•BAK1                      | $\frac{d[bak1.mcl1]}{dt} = b_{bak1}^{mcl1} * [bak1] * [mcl1] - u_{bak1}^{mcl1} * [bak1.mcl1] - d_{bak1} * [bak1.mcl1] - d_{mcl1} * [bak1.mcl1]$                                                                                                                                                                                                                                                                                                                                         |
| BCL2•BAK1                      | $\frac{d[bak1.bcl2]}{dt} = b_{bak1}^{bcl2} * [bak1] * [bcl2] - u_{bak1}^{bcl2} * [bak1.bcl2] - d_{bak1} * [bak1.bcl2] - d_{bcl2} * [bak1.bcl2]$                                                                                                                                                                                                                                                                                                                                         |
| BCL-w•BAK1                     | $\frac{d[bak1.bclw]}{dt} = b_{bak1}^{bclw} * [bak1] * [bclw] - u_{bak1}^{bclw} * [bak1.bclw] - d_{bak1} * [bak1.bclw] - d_{bclw} * [bak1.bclw]$                                                                                                                                                                                                                                                                                                                                         |
| Total BAK1                     | $\frac{d[bak1_{total}]}{dt} = \frac{d[inbak1]}{dt} + \frac{d[bak1]}{dt} + \frac{d[bak1.mcl1]}{dt} + \frac{d[bak1.bcl2]}{dt} + \frac{d[bak1.bclw]}{dt} + 2 * \frac{d[bakdimer]}{dt}$                                                                                                                                                                                                                                                                                                     |
| BAX mRNA                       | $\frac{d[mRNA_{bax}]}{dt} = k_{mRNA_{bax}} \left( 0.5 + \frac{([p53]/2)^{1.8}}{73^{1.8} + ([p53]/2)^{1.8}} \right) - d_{mRNA_{bax}} [mRNA_{bax}]$                                                                                                                                                                                                                                                                                                                                       |
| Unbound,<br>Inactivated BAX    | $\frac{d[inbax]}{dt} = k_{bax} * [mRNA_{bax}] - d_{bax} * [inbax] - k_{act} * (AddAct + [puma]) * [inbax] + k_{deact} * [bax]$                                                                                                                                                                                                                                                                                                                                                          |
| Unbound,<br>Activated BAX      | $\frac{d[bax]}{dt} = k_{act} * (AddAct + [puma]) * [inbax] - k_{deact} * [bax] - b_{bax}^{mcl1} * [bax] * [mcl1] + u_{bax}^{mcl1} * [bax.mcl1] - b_{bax}^{bcl2} * [bax] * [bcl2] + u_{bax}^{bcl2} * [bax.bcl2] - b_{bax}^{bclw} * [bax] * [bclw] + u_{bax}^{bclw} * [bax.bclw] - 2 * b_{baxdimer} * [bax]^2 + 2 * u_{baxdimer} * [baxdimer] - d_{bax} * [bax] + 2 * d_{bax} * [baxdimer] + d_{mcl1} * [bax.mcl1] + d_{bcl2} * [bax.bcl2] + d_{bclw} * [bax.bclw]$                       |

|               |                                                                                                                                                                                                                                                                                                                                                                                                                                       |
|---------------|---------------------------------------------------------------------------------------------------------------------------------------------------------------------------------------------------------------------------------------------------------------------------------------------------------------------------------------------------------------------------------------------------------------------------------------|
| BAX Homodimer | $\frac{d[bax_{dimer}]}{dt} = b_{bax_{dimer}} * [bax]^2 - u_{bax_{dimer}} * [bax_{dimer}] - 2 * d_{bax} * [bax_{dimer}]$                                                                                                                                                                                                                                                                                                               |
| MCL1•BAX      | $\frac{d[bax.mcl1]}{dt} = b_{bax}^{mcl1} * [bax] * [mcl1] - u_{bax}^{mcl1} * [bax.mcl1] - d_{bax} * [bax.mcl1] - d_{mcl1} * [bax.mcl1]$                                                                                                                                                                                                                                                                                               |
| BCL2•BAX      | $\frac{d[bax.bcl2]}{dt} = b_{bax}^{bcl2} * [bax] * [bcl2] - u_{bax}^{bcl2} * [bax.bcl2] - d_{bax} * [bax.bcl2] - d_{bcl2} * [bax.bcl2]$                                                                                                                                                                                                                                                                                               |
| BCL-w•BAX     | $\frac{d[bax.bclw]}{dt} = b_{bax}^{bclw} * [bax] * [bclw] - u_{bax}^{bclw} * [bax.bclw] - d_{bax} * [bax.bclw] - d_{bclw} * [bax.bclw]$                                                                                                                                                                                                                                                                                               |
| Total BAX     | $\frac{d[bax_{total}]}{dt} = \frac{d[inbax]}{dt} + \frac{d[bax]}{dt} + \frac{d[bax.mcl1]}{dt} + \frac{d[bax.bcl2]}{dt} + \frac{d[bax.bclw]}{dt} + 2 * \frac{d[bax_{dimer}]}{dt}$                                                                                                                                                                                                                                                      |
| Unbound MCL1  | $\frac{d[mcl1]}{dt} = k_{mcl1} * (1 - f) - d_{mcl1} * [mcl1] - b_{mcl1}^{puma} * [mcl1] * [puma] + u_{mcl1}^{puma} * [mcl1.puma] - b_{bak1}^{mcl1} * [bak1] * [mcl1] + u_{bak1}^{mcl1} * [bak1.mcl1] - b_{bax_{mcl1}} * [bax] * [mcl1] + u_{bax_{mcl1}} * [bax.mcl1] + d_{bak1} * [bak1.mcl1] + d_{bax} * [bax.mcl1] + d_{puma} * [mcl1.puma]$                                                                                        |
| MCL1•PUMA     | $\frac{d[mcl1.puma]}{dt} = b_{mcl1}^{puma} * [mcl1] * [puma] - u_{mcl1}^{puma} * [mcl1.puma] - d_{mcl1} * [mcl1.puma] - d_{puma} * [mcl1.puma]$                                                                                                                                                                                                                                                                                       |
| Total MCL1    | $\frac{d[mcl1_{total}]}{dt} = \frac{d[mcl1]}{dt} + \frac{d[bak1.mcl1]}{dt} + \frac{d[bax.mcl1]}{dt} + \frac{d[mcl1.puma]}{dt}$                                                                                                                                                                                                                                                                                                        |
| Unbound BCL2  | $\frac{d[bcl2]}{dt} = k_{bcl2} * (1 - f) - d_{bcl2} * [bcl2] - b_{bcl2}^{puma} * [bcl2] * [puma] + u_{bcl2}^{puma} * [bcl2.puma] - b_{bcl2}^{bmf} * [bcl2] * [bmf] + u_{bcl2}^{bmf} * [bcl2.bmf] - b_{bak1}^{bcl2} * [bak1] * [bcl2] + u_{bak1}^{bcl2} * [bak1.bcl2] - b_{bax}^{bcl2} * [bax] * [bcl2] + u_{bax}^{bcl2} * [bax.bcl2] + d_{bak1} * [bak1.bcl2] + d_{bax} * [bax.bcl2] + d_{puma} * [bcl2.puma] + d_{bmf} * [bcl2.bmf]$ |
| BCL2•PUMA     | $\frac{d[bcl2.puma]}{dt} = b_{bcl2}^{puma} * [bcl2] * [puma] - u_{bcl2}^{puma} * [bcl2.puma] - d_{bcl2} * [bcl2.puma] - d_{puma} * [bcl2.puma]$                                                                                                                                                                                                                                                                                       |
| BCL2•BMF      | $\frac{d[bcl2.bmf]}{dt} = b_{bcl2}^{bmf} * [bcl2] * [bmf] - u_{bcl2}^{bmf} * [bcl2.bmf] - d_{bcl2} * [bcl2.bmf] - d_{bmf} * [bcl2.bmf]$                                                                                                                                                                                                                                                                                               |
| Total BCL2    | $\frac{d[bcl2_{total}]}{dt} = \frac{d[bcl2]}{dt} + \frac{d[bak1.bcl2]}{dt} + \frac{d[bax.bcl2]}{dt} + \frac{d[bcl2.puma]}{dt} + \frac{d[bcl2.bmf]}{dt}$                                                                                                                                                                                                                                                                               |

|               |                                                                                                                                                                                                                                                                                                                                                                                                                                       |
|---------------|---------------------------------------------------------------------------------------------------------------------------------------------------------------------------------------------------------------------------------------------------------------------------------------------------------------------------------------------------------------------------------------------------------------------------------------|
| Unbound BCL-w | $\frac{d[bclw]}{dt} = k_{bclw} * (1 - f) - d_{bclw} * [bclw] - b_{bclw}^{bmf} * [bclw] * [bmf] + u_{bclw}^{bmf} * [bclw.bmf] - b_{bclw}^{puma} * [bclw] * [puma] + u_{bclw}^{puma} * [bclw.puma] - b_{bak1}^{bclw} * [bak1] * [bclw] + u_{bak1}^{bclw} * [bak1.bclw] - b_{bax}^{bclw} * [bax] * [bclw] + u_{bax}^{bclw} * [bax.bclw] + d_{bak1} * [bak1.bclw] + d_{bax} * [bax.bclw] + d_{bmf} * [bclw.bmf] + d_{puma} * [bclw.puma]$ |
| BCL-w•BMF     | $\frac{d[bclw.bmf]}{dt} = b_{bclw}^{bmf} * [bclw] * [bmf] - u_{bclw}^{bmf} * [bclw.bmf] - d_{bclw} * [bclw.bmf] - d_{bmf} * [bclw.bmf]$                                                                                                                                                                                                                                                                                               |
| BCL-w•PUMA    | $\frac{d[bclw.puma]}{dt} = b_{bclw}^{puma} * [bclw] * [puma] - u_{bclw}^{puma} * [bclw.puma] - d_{bclw} * [bclw.puma] - d_{puma} * [bclw.puma]$                                                                                                                                                                                                                                                                                       |
| Total BCL-w   | $\frac{d[bclw_{total}]}{dt} = \frac{d[bclw]}{dt} + \frac{d[bak1.bclw]}{dt} + \frac{d[bax.bclw]}{dt} + \frac{d[bclw.puma]}{dt} + \frac{d[bclw.bmf]}{dt}$                                                                                                                                                                                                                                                                               |
| PUMA mRNA     | $\frac{d[mRNA_{puma}]}{dt} = k_{mRNA_{puma}} * \left( \frac{([p53]/2)^{1.8}}{6.9^{1.8} + ([p53]/2)^{1.8}} \right) - d_{mRNA_{puma}} [mRNA_{puma}]$                                                                                                                                                                                                                                                                                    |
| Unbound PUMA  | $\frac{d[puma]}{dt} = k_{puma} * [mRNA_{puma}] * (1 - f) - d_{puma} * [puma] - b_{mcl1}^{puma} * [mcl1] * [puma] + u_{mcl1}^{puma} * [mcl1.puma] - b_{bcl2}^{puma} * [bcl2] * [puma] + u_{bcl2}^{puma} * [bcl2.puma] - b_{bclw}^{puma} * [bclw] * [puma] + u_{bclw}^{puma} * [bclw.puma] + d_{mcl1} * [mcl1.puma] + d_{bcl2} * [bcl2.puma] + d_{bclw} * [bclw.puma]$                                                                  |
| Total PUMA    | $\frac{d[puma_{total}]}{dt} = \frac{d[puma]}{dt} + \frac{d[mcl1.puma]}{dt} + \frac{d[bcl2.puma]}{dt} + \frac{d[bclw.puma]}{dt}$                                                                                                                                                                                                                                                                                                       |
| Unbound BMF   | $\frac{d[bmf]}{dt} = k_{bmf} * (1 - f) - d_{bmf} * [bmf] - b_{bcl2}^{bmf} * [bcl2] * [bmf] + u_{bcl2}^{bmf} * [bcl2.bmf] - b_{bclw}^{bmf} * [bclw] * [bmf] + u_{bclw}^{bmf} * [bclw.bmf] + d_{bcl2} * [bcl2.bmf] + d_{bclw} * [bclw.bmf]$                                                                                                                                                                                             |
| Total BMF     | $\frac{d[bmf_{total}]}{dt} = \frac{d[bmf]}{dt} + \frac{d[bcl2.bmf]}{dt} + \frac{d[bclw.bmf]}{dt}$                                                                                                                                                                                                                                                                                                                                     |
| P53           | $\frac{d[p53]}{dt} = k_{p53} * (1 - f) - d_{p53} * [p53]$                                                                                                                                                                                                                                                                                                                                                                             |

$f$  = fraction of gene's mRNA inhibited by miR-125b (value between 0 and 1)

$k$  = production rate constant

$d$  = degradation rate constant

$b$  = binding (association) rate constant

$u$  = unbinding (dissociation) rate constant

$k_{act}$  = BAK1/BAX activation rate constant

$k_{deact}$  = BAK1/BAX deactivation rate constant

$[X]$  = concentration of unbound protein X

$[X.Y]$  = concentration of protein X-protein Y complex

$AddAct$  = baseline additional activator

## Model Parameters

**Table S3: Production and degradation rate constants, Related to STAR Methods**

| Protein | Concentration (nM) | Half-Life (hrs) | $k_{deg}$ ( $min^{-1}$ ) | $k_{prod}$ ( $nM\ min^{-1}$ ) | Source References                                                 |
|---------|--------------------|-----------------|--------------------------|-------------------------------|-------------------------------------------------------------------|
| P53     | 140                | 0.33            | 0.03466                  | 4.852                         | (Gaglia et al., 2013; Ma et al., 2005; Maltzman and Czyzyk, 1984) |
| PUMA    | 400                | 3.4             | 0.003398                 | 1.359                         | (Fricker et al., 2010; Lindner et al., 2013)                      |
| BMF     | 400                | 3.4             | 0.003398                 | 1.359                         | (Grespi et al., 2010)                                             |
| MCL1    | 400                | 1               | 0.01155                  | 4.621                         | (Dai et al., 2009; Lindner et al., 2013; Stewart et al., 2010)    |
| BCL2    | 400                | 20              | 0.0005776                | 0.23104                       | (Lindner et al., 2013; Rooswinkel et al., 2014)                   |
| BCL-w   | 400                | 20              | 0.0005776                | 0.23104                       | (Rooswinkel et al., 2014)                                         |
| BAX     | 600                | 11.6            | 0.0009959                | 0.5975                        | (Lindner et al., 2013; Wang et al., 2010)                         |
| BAK1    | 600                | 48              | 0.0002407                | 0.1444                        | (Ferrer et al., 2012; Lindner et al., 2013)                       |

**Table S4: Protein complex association and dissociation rate constants, Related to STAR Methods**

| Protein Complex | $K_D$ (nM) | Association Rate ( $nM^{-1}\ min^{-1}$ ) | Dissociation Rate ( $min^{-1}$ ) | Source References                                          |
|-----------------|------------|------------------------------------------|----------------------------------|------------------------------------------------------------|
| MCL1•PUMA       | 2.62       | 0.005954                                 | 0.0156                           | (Chen et al., 2005; Ku et al., 2011; Lindner et al., 2013) |
| MCL1•BAX        | 39.5       | 0.00039492                               | 0.0156                           | (Chen et al., 2005; Ku et al., 2011; Lindner et al., 2013) |
| MCL1•BAK1       | 1.33       | 0.01173                                  | 0.0156                           | (Chen et al., 2005; Ku et al., 2011; Lindner et al., 2013) |
| BCL2•BMF        | 13.9       | 0.0006042                                | 0.0084                           | (Chen et al., 2005; Ku et al., 2011; Lindner et al., 2013) |
| BCL2•PUMA       | 3.04       | 0.002763                                 | 0.0084                           | (Chen et al., 2005; Ku et al., 2011; Lindner et al., 2013) |
| BCL2•BAX        | 15.1       | 0.00055629                               | 0.0084                           | (Chen et al., 2005; Ku et al., 2011; Lindner et al., 2013) |
| BCL2•BAK1       | 70.4       | 0.00011934                               | 0.0084                           | (Chen et al., 2005; Ku et al., 2011; Lindner et al., 2013) |
| BCL-w•BMF       | 10.9       | 0.014862                                 | 0.162                            | (Chen et al., 2005; Ku et al., 2011)                       |
| BCL-w•PUMA      | 5.13       | 0.031578                                 | 0.162                            | (Chen et al., 2005; Ku et al., 2011)                       |
| BCL-w•BAX       | 22.9       | 0.007074                                 | 0.162                            | (Chen et al., 2005; Ku et al., 2011)                       |
| BCL-w•BAK1      | 114        | 0.0014208                                | 0.162                            | (Chen et al., 2005; Ku et al., 2011)                       |
| BAX Homodimer   | 15         | 0.000768                                 | 0.01158                          | (Lindner et al., 2013)                                     |
| BAK1 Homodimer  | 15         | 0.000768                                 | 0.01158                          | (Lindner et al., 2013)                                     |

**Table S5: Rate constants for BAX/BAK1 activation and deactivation, Related to STAR Methods**

| Reaction        | Activation Rate ( $nM^{-1}\ min^{-1}$ ) | Deactivation Rate ( $min^{-1}$ ) | Source References                        |
|-----------------|-----------------------------------------|----------------------------------|------------------------------------------|
| BAX Activation  | 0.0001542                               | 0.01542                          | (Dai et al., 2011; Lindner et al., 2013) |
| BAK1 Activation | 0.0001542                               | 0.01542                          | (Dai et al., 2011; Lindner et al., 2013) |

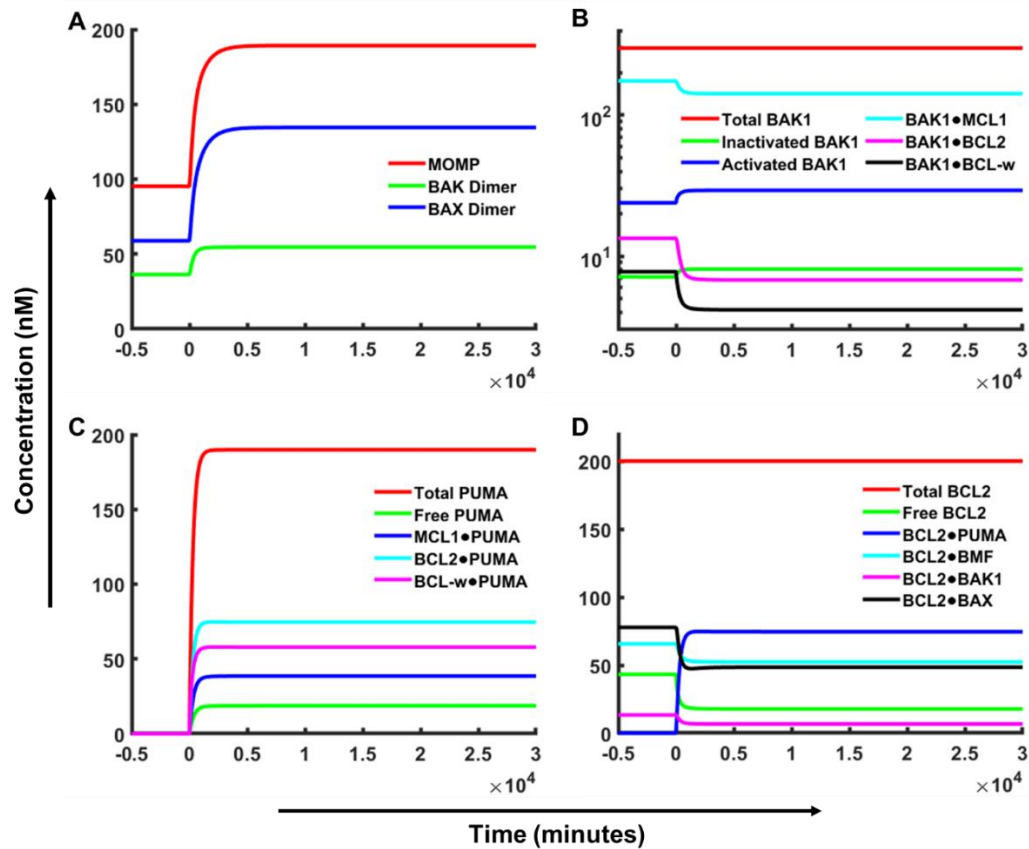

**Figure S1: Typical concentration vs. time plots for several components of the model, Related to STAR Methods.** The model was run with the default parameter values and 400 nM baseline activator. At time zero, after the model had reached steady-state, P53 was activated to generate an apoptotic response, and the model continued to run until steady-state was again achieved. The MOMP and respective BAK1 and BAX dimer concentrations are shown in (A). The total BAK1, PUMA, and BCL2 concentrations, and the concentrations of each of their respective states are shown in (B), (C), and (D), respectively.

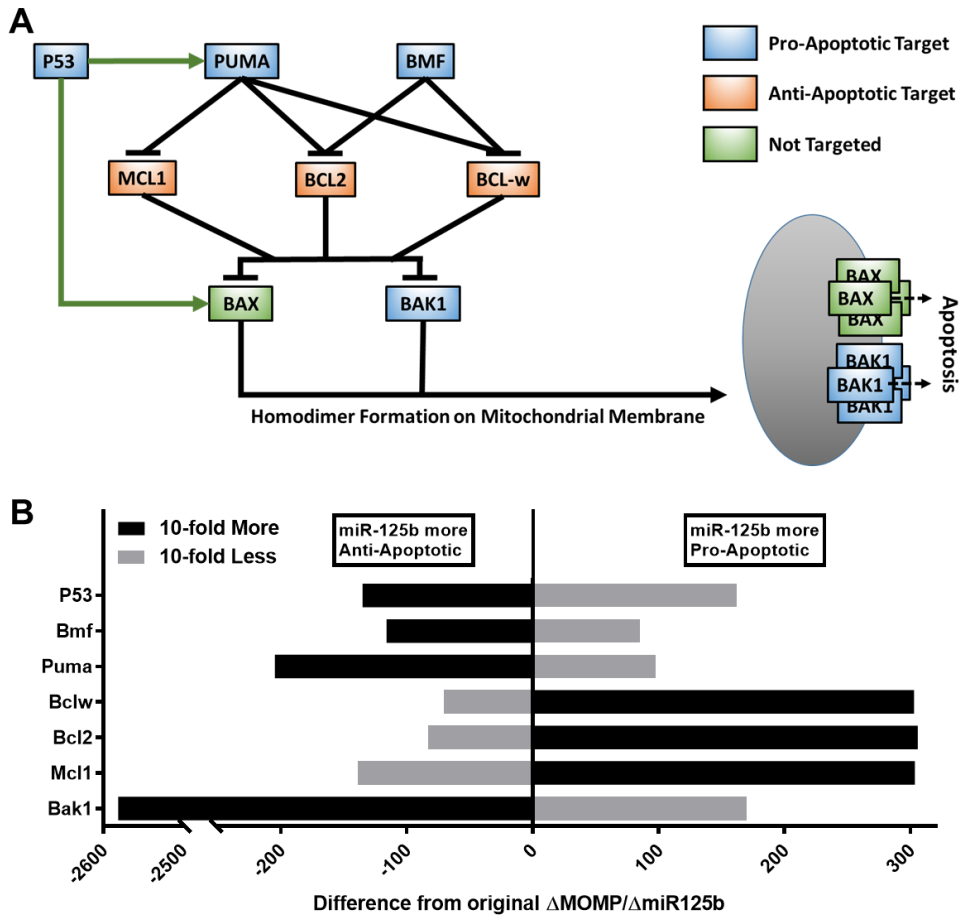

**Figure S2: Results with indirect activation model of the apoptosis pathway, Related to Figure 3.**

A) Diagram of the indirect activation model of the apoptosis pathway. Blue and orange boxes represent pro-apoptotic and anti-apoptotic members, respectively, of the pathway that are targeted by miR-125b. Green boxes represent closely interacting members of the pathway that are not targeted by miR-125b. Green arrowheads from P53 represent transcriptional activation. Hammerheads represent inhibition by direct binding. BAX and BAK1 are constitutively active, and, when not inhibited, form homodimers on the mitochondrial membrane, which are in turn linked together to form pores that result in apoptosis.

B) Difference in the apoptoticity (average slope of curve for MOMP vs. miR-125b) compared to default parameter values for each miR-125b-targeted component of the indirect activation model when the production rate was increased 10-fold (black) or decreased 10-fold (gray). Mir-125b is more anti-apoptotic left of the vertical axis and more pro-apoptotic right of the vertical axis.



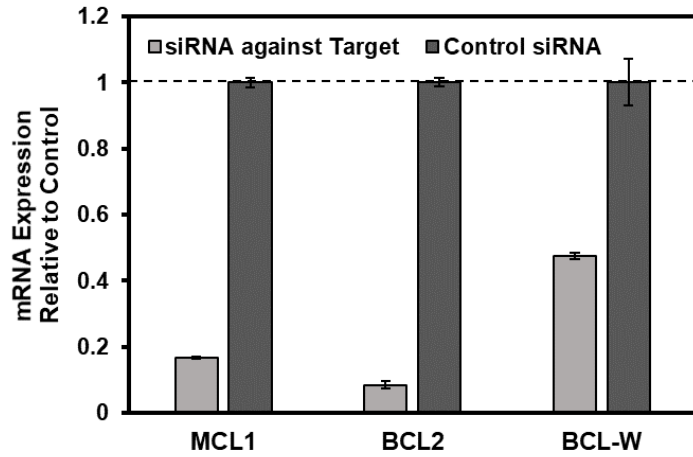

**Figure S3: siRNA-mediated inhibition of target mRNAs, Related to Figure 4.** RT-qPCR results for NCI-H23 cells co-transfected with the indicated siRNA and miRNA mimic negative control. Data are shown as mean  $\pm$  S.E.;  $P < 0.01$  for all samples.
